# Supplementary material
Source: PubMed Central journal article supplement (PMC4594172)
Supplement: NIHMS710502-supplement-CME_Quiz.pdf [file NIHMS710502-supplement-CME_Quiz.pdf]

# OBSTETRICS & GYNECOLOGY



## CME for the Clinical Expert Series

### Management of Menopausal Symptoms

Andrew M. Kaunitz, MD and JoAnn E. Manson, MD, DrPH  
*Obstet Gynecol* 2015;126(4)

Continuing Medical Education credit is provided through joint sponsorship with The American College of Obstetricians and Gynecologists.

#### File Available Online:

[CME Quiz for “Management of Menopausal Symptoms”](#)

Please click this link to start the quiz.

If prompted, choose “Save” or “Save As” (do not choose “Open”).  
Note that this quiz cannot be completed on a tablet or mobile device.

---

#### ACCME Accreditation

The American College of Obstetricians and Gynecologists is accredited by the Accreditation Council for Continuing Medical Education (ACCME) to provide continuing medical education for physicians.

#### AMA PRA Category 1 Credit(s)<sup>TM</sup>

The American College of Obstetricians and Gynecologists designates this **enduring material** for a maximum of 2 *AMA PRA Category 1 Credits*<sup>TM</sup>. Physicians should claim only the credit commensurate with the extent of their participation in the activity.

#### College Cognate Credit(s)

The American College of Obstetricians and Gynecologists designates this **enduring material** for a maximum of 2 Category 1 College Cognate Credits. The College has a reciprocity agreement with the AMA that allows *AMA PRA Category 1 Credits*<sup>TM</sup> to be equivalent to College Cognate Credits.

---

**Hardware/Software Requirements:** Microsoft Word on PC or Mac computer (desktop or laptop).

**Policy on Privacy and Confidentiality:** The privacy policy for [www.greenjournal.org](http://www.greenjournal.org) is [available online](#).

**Contact Information for Questions:** *Obstetrics & Gynecology* Editorial Office, 202-314-2317 (phone) or [obgyn@greenjournal.org](mailto:obgyn@greenjournal.org) (e-mail).
